# Supplementary material for: The Association Between Periodontitis and Erectile Dysfunction: A Systematic Review and Meta-Analysis
Source: PubMed Central journal article supplement — Am J Mens Health. 2021 May 20;15(3):15579883211007277. doi: 10.1177/15579883211007277 (PMC8142012; doi:10.1177/15579883211007277), 2021-05-20
Supplement: sj-pdf-1-jmh-10.1177_15579883211007277.pdf [file sj-pdf-1-jmh-10.1177_15579883211007277.pdf]

**Supplemet Table 1 : GRADE assessment**

| Certainty assessment |              |              |               |              |             |                      | № of patients |                   | Effect            |                   | Certainty | Importance |
|----------------------|--------------|--------------|---------------|--------------|-------------|----------------------|---------------|-------------------|-------------------|-------------------|-----------|------------|
| № of studies         | Study design | Risk of bias | Inconsistency | Indirectness | Imprecision | Other considerations | Periodontitis | Non-periodontitis | Relative (95% CI) | Absolute (95% CI) |           |            |

**Erectile Dysfunction**

|   |                       |             |                      |             |             |                    |                     |                     |                                  |                                                         |                 |  |
|---|-----------------------|-------------|----------------------|-------------|-------------|--------------------|---------------------|---------------------|----------------------------------|---------------------------------------------------------|-----------------|--|
| 6 | observational studies | not serious | serious <sup>a</sup> | not serious | not serious | strong association | 10296/38675 (26.6%) | 17310/176333 (9.8%) | <b>OR 2.56</b><br>(1.70 to 3.85) | <b>120 more per 1,000</b><br>(from 58 more to 197 more) | ⊕⊕○<br>○<br>LOW |  |
|---|-----------------------|-------------|----------------------|-------------|-------------|--------------------|---------------------|---------------------|----------------------------------|---------------------------------------------------------|-----------------|--|

**Question:** Periodontitis compared to Non-periodontitis in Erectile Dysfunction

**CI:** Confidence interval; **OR:** Odds ratio

**Explanation**

a.  $I^2$  is 98% indicating substantial heterogeneity, chi square statistic is large relative to the DOF with a low p-value,  $\text{Tau}^2$  is 0.20.
